# Supplementary material for: Lysine Methyltransferase Inhibitors Impair H4K20me2 and 53BP1 Foci in Response to DNA Damage in Sarcomas, a Synthetic Lethality Strategy
Source: PubMed Central journal article supplement (PMC8446283; doi:10.3389/fcell.2021.715126), 2021-09-03
Supplement: Table_1.pdf [file Table_1.pdf]

### Supplementary Table 1

Reagents used in this work

| <b>Reagent</b>   | <b>Reference</b> | <b>Supplier</b>        |
|------------------|------------------|------------------------|
| Doxorubicin      | 16416646         | Fisher BioReagents     |
| Chaetocin        | C9492            | Sigma-Aldrich-Merck    |
| Olaparib         | O-9201           | LC Laboratories        |
| Tazemetostat     | S7128            | Selleck                |
| JMJD2i           | 420201           | Calbiochem (Millipore) |
| NaF              | 20154            | Sigma-Aldrich-Merck    |
| Hepes            | H3375            | Sigma-Aldrich-Merck    |
| Triton X-100     | T8787            | Sigma-Aldrich-Merck    |
| SDS              | L3771            | Sigma-Aldrich-Merck    |
| Na orthovanadate | 450243           | Sigma-Aldrich-Merck    |
| PMSF             | 78830            | Sigma-Aldrich-Merck    |
| Aprotinin        | A6103            | Sigma-Aldrich-Merck    |
| Leupeptin        | L9783            | Sigma-Aldrich-Merck    |
| Tween 20         | P2287            | Sigma-Aldrich-Merck    |
